# Supplementary material
Source: PubMed Central journal article supplement (PMC6878125)
Supplement: NIHMS1044099-supplement-supp_info.pdf [file NIHMS1044099-supplement-supp_info.pdf]

## **Supplementary Materials**

**Whole-Exome and RNA-Sequencing Analyses of Acinic Cell Carcinomas of the Breast**

**Beca et al.**

**Supplementary Methods**

**Supplementary Figure 1**

**Supplementary Tables 1-5**

## **SUPPLEMENTARY METHODS**

### **Subjects and samples**

Following Institutional Review Boards approval formalin-fixed paraffin embedded tissue blocks of acinic cell carcinomas (ACCs) of the breast were retrieved from the archives of the Department of Pathology of the Nottingham City Hospital/Nottingham University Hospitals NHS Trust. Estrogen receptor (ER) and HER2 status was evaluated following the ASCO/CAP guidelines<sup>1,2</sup>. Informed consent was obtained according to the the protocol approved by the local Institutional Review Board (IRB). Cases were reviewed by three pathologists (E.P., E.G-R. and J.S.R.F.), classified as breast ACCs following the criteria put forward by the World Health Organization<sup>3</sup>, and graded according to the Nottingham grading system<sup>4</sup>. Immunohistochemical assessment of MLH1 expression was performed on a Leica Bond III automated stainer platform (Leica, Buffalo Grove, IL) using the anti-MLH1 monoclonal antibody (clone ES05; catalogue #: 26408; Leica Biosystems, Newcastle, UK) at a 1:500 dilution for 30 minutes following EDTA-based high pH epitope retrieval. The standard platform-associated polymeric detection kit (Refine, Leica) was used as secondary reagent. Positive and negative controls were included in each slide run. For MLH1 immunohistochemical analysis, a case was considered interpretable if MLH1 expression could be detected in stromal and/or inflammatory cells (i.e. internal positive control).

### **Whole-exome sequencing analysis**

DNA samples derived from microdissected tumor and normal tissue from ACCs were subjected to whole-exome sequencing (WES) at the Integrated Genomics Operations (IGO) of Memorial Sloan Kettering Cancer Center (MSKCC) using validated protocols, as previously described.<sup>5,6</sup> Reads were aligned to the reference human genome GRCh37 using the Burrows-Wheeler Aligner (BWA, v.0.7.10)<sup>7</sup>. Local realignment, duplicate removal, and base quality recalibration were performed using the Genome Analysis Toolkit (GATK, v3.1.1).<sup>8</sup> Sequencing

data were analyzed as previously described.<sup>5, 6</sup> In brief, somatic single nucleotide variants (SNVs) were detected by MuTect (v1.0.0)<sup>9</sup>, small insertion and deletion (indels) by Strelka (v.2.0.15),<sup>10</sup> VarScan2 (v.2.3.7),<sup>11</sup> Lancet (v1.0.0)<sup>12</sup> and Scalpel (v0.5.53)<sup>13</sup>. SNVs and indels with a >1% global minor allele frequency in ExAC<sup>14</sup> were excluded. We additionally filtered for the FFPE pooled normal passenger mutations by 1) removing mutations with > 1% global minor allele frequency in gnomAD<sup>15</sup>, 2) removing the mutations with a normal locus depth of less than 10 and 3) include only mutation in both gnomAD and ExAC. ABSOLUTE (v1.0.6)<sup>16</sup> was employed to determine the cancer cell fraction (CCF) of each mutation. FACETS<sup>17</sup> was used to determine copy number alterations and whether genes harboring a somatic mutation were targeted by loss of heterozygosity as previously described<sup>5, 6</sup>. Large-scale state transitions (LST) score<sup>18</sup>, NtAI score<sup>19</sup> and Myriad score<sup>20</sup> were calculated as genomic features of homologous recombination DNA repair deficiency as previously described<sup>21</sup>. Mutations affecting hotspot codons were annotated according to Chang et al.<sup>22</sup> Mutational signatures were defined using Sigma Multivariate Analysis (SigMA)<sup>23</sup> using all synonymous and non-synonymous mutations. Microsatellite instability was quantified using MSIsensor<sup>24</sup>, as previously described<sup>25</sup>.

### **RNA-sequencing and fusion gene identification**

RNA extracted from all three ACCs included in this study was subjected to RNA-sequencing at MSK's IGO using validated protocols<sup>26, 27</sup>. In brief, paired-end RNA-sequencing was performed with 2x100 bp cycles on an Illumina HiSeq2000. We identified read pairs supporting fusion transcripts using INTEGRATE<sup>28</sup>, deFuse<sup>29</sup> and FusionCatcher<sup>30</sup>. Fusion genes and read-through candidates that were detected in a set of 297 normal samples from The Cancer Genome Atlas (TCGA)<sup>31</sup> were excluded to account for alignment artifacts and normal transcriptional variants. Remaining candidate fusions were annotated using OncoFuse<sup>32</sup> to define their oncogenic potential. Additionally, the presence of candidate fusion

genes was inferred on the tumor fusion gene data portal<sup>33</sup>, which comprises a list of 20,731 fusion genes across 33 cancer types (n=9,950).

## SUPPLEMENTARY REFERENCES

1. Wolff AC, Hammond MEH, Allison KH *et al.* Human epidermal growth factor receptor 2 testing in breast cancer: American society of clinical oncology/college of american pathologists clinical practice guideline focused update. *Arch Pathol Lab Med* 2018;**142**;1364-1382.
2. Hammond ME, Hayes DF, Dowsett M *et al.* American society of clinical oncology/college of american pathologists guideline recommendations for immunohistochemical testing of estrogen and progesterone receptors in breast cancer. *J Clin Oncol* 2010;**28**;2784-2795.
3. Lakhani SR, Ellis IO, Schnitt SJ, Tan PH, van de Vijver MJ. *Who classification of breast tumors*. IARC: Lyon, 2012.
4. Elston CW, Ellis IO. Pathological prognostic factors in breast cancer. I. The value of histological grade in breast cancer: Experience from a large study with long-term follow-up. *Histopathology* 1991;**19**;403-410.
5. Pareja F, Brandes AH, Basili T *et al.* Loss-of-function mutations in atp6ap1 and atp6ap2 in granular cell tumors. *Nat Commun* 2018;**9**;3533.
6. Geyer FC, Li A, Papanastasiou AD *et al.* Recurrent hotspot mutations in hras q61 and pi3k-akt pathway genes as drivers of breast adenomyoepitheliomas. *Nat Commun* 2018;**9**;1816.
7. Li H, Durbin R. Fast and accurate long-read alignment with burrows-wheeler transform. *Bioinformatics* 2010;**26**;589-595.
8. McKenna A, Hanna M, Banks E *et al.* The genome analysis toolkit: A mapreduce framework for analyzing next-generation DNA sequencing data. *Genome Res* 2010;**20**;1297-1303.
9. Cibulskis K, Lawrence MS, Carter SL *et al.* Sensitive detection of somatic point mutations in impure and heterogeneous cancer samples. *Nat Biotechnol* 2013;**31**;213-219.

10. Saunders CT, Wong WS, Swamy S, Becq J, Murray LJ, Cheetham RK. Strelka: Accurate somatic small-variant calling from sequenced tumor-normal sample pairs. *Bioinformatics* 2012;**28**;1811-1817.
11. Koboldt DC, Zhang Q, Larson DE *et al.* VarScan 2: Somatic mutation and copy number alteration discovery in cancer by exome sequencing. *Genome Res* 2012;**22**;568-576.
12. Narzisi G, Corvelo A, Arora K *et al.* Genome-wide somatic variant calling using localized colored de bruijn graphs. *Commun Biol* 2018;**1**;20.
13. Narzisi G, O'Rawe JA, Iossifov I *et al.* Accurate de novo and transmitted indel detection in exome-capture data using microassembly. *Nat Methods* 2014;**11**;1033-1036.
14. Lek M, Karczewski KJ, Minikel EV *et al.* Analysis of protein-coding genetic variation in 60,706 humans. *Nature* 2016;**536**;285-291.
15. Karczewski KJ, Francioli LC, Tiao G *et al.* Variation across 141,456 human exomes and genomes reveals the spectrum of loss-of-function intolerance across human protein-coding genes. *bioRxiv* 2019.
16. Carter SL, Cibulskis K, Helman E *et al.* Absolute quantification of somatic DNA alterations in human cancer. *Nat Biotechnol* 2012;**30**;413-421.
17. Shen R, Seshan VE. Facets: Allele-specific copy number and clonal heterogeneity analysis tool for high-throughput DNA sequencing. *Nucleic Acids Res* 2016;**44**;e131.
18. Popova T, Manie E, Rieunier G *et al.* Ploidy and large-scale genomic instability consistently identify basal-like breast carcinomas with brca1/2 inactivation. *Cancer Res* 2012;**72**;5454-5462.
19. Birkbak NJ, Wang ZC, Kim JY *et al.* Telomeric allelic imbalance indicates defective DNA repair and sensitivity to DNA-damaging agents. *Cancer Discov* 2012;**2**;366-375.
20. Telli ML, Timms KM, Reid J *et al.* Homologous recombination deficiency (hrd) score predicts response to platinum-containing neoadjuvant chemotherapy in patients with triple-negative breast cancer. *Clin Cancer Res* 2016;**22**;3764-3773.

21. Mutter RW, Riaz N, Ng CK *et al.* Bi-allelic alterations in DNA repair genes underpin homologous recombination DNA repair defects in breast cancer. *J Pathol* 2017;**242**;165-177.
22. Chang MT, Bhattarai TS, Schram AM *et al.* Accelerating discovery of functional mutant alleles in cancer. *Cancer Discov* 2018;**8**;174-183.
23. Gulhan DC, Lee JJ, Melloni GEM, Cortes-Ciriano I, Park PJ. Detecting the mutational signature of homologous recombination deficiency in clinical samples. *Nat Genet* 2019;**51**;912-919.
24. Niu B, Ye K, Zhang Q *et al.* Msisensor: Microsatellite instability detection using paired tumor-normal sequence data. *Bioinformatics* 2014;**30**;1015-1016.
25. Ashley CW, Da Cruz Paula A, Kumar R *et al.* Analysis of mutational signatures in primary and metastatic endometrial cancer reveals distinct patterns of DNA repair defects and shifts during tumor progression. *Gynecol Oncol* 2019;**152**;11-19.
26. Pareja F, Lee JY, Brown DN *et al.* The genomic landscape of mucinous breast cancer. *J Natl Cancer Inst* 2019.
27. Geyer FC, Burke KA, Piscuoglio S *et al.* Genetic analysis of uterine adenosarcomas and phyllodes tumors of the breast. *Mol Oncol* 2017;**11**;913-926.
28. Zhang J, White NM, Schmidt HK *et al.* Integrate: Gene fusion discovery using whole genome and transcriptome data. *Genome Res* 2016;**26**;108-118.
29. McPherson A, Hormozdiari F, Zayed A *et al.* Defuse: An algorithm for gene fusion discovery in tumor rna-seq data. *PLoS Comput Biol* 2011;**7**;e1001138.
30. Edgren H, Murumagi A, Kangaspeska S *et al.* Identification of fusion genes in breast cancer by paired-end rna-sequencing. *Genome Biol* 2011;**12**;R6.
31. Cancer Genome Atlas N. Comprehensive molecular portraits of human breast tumours. *Nature* 2012;**490**;61-70.

32. Shugay M, Ortiz de Mendibil I, Vizmanos JL, Novo FJ. Oncofuse: A computational framework for the prediction of the oncogenic potential of gene fusions. *Bioinformatics* 2013;**29**;2539-2546.
33. Hu X, Wang Q, Tang M *et al.* Tumorfusions: An integrative resource for cancer-associated transcript fusions. *Nucleic Acids Res* 2018;**46**;D1144-D1149.

Supplementary Figure 1

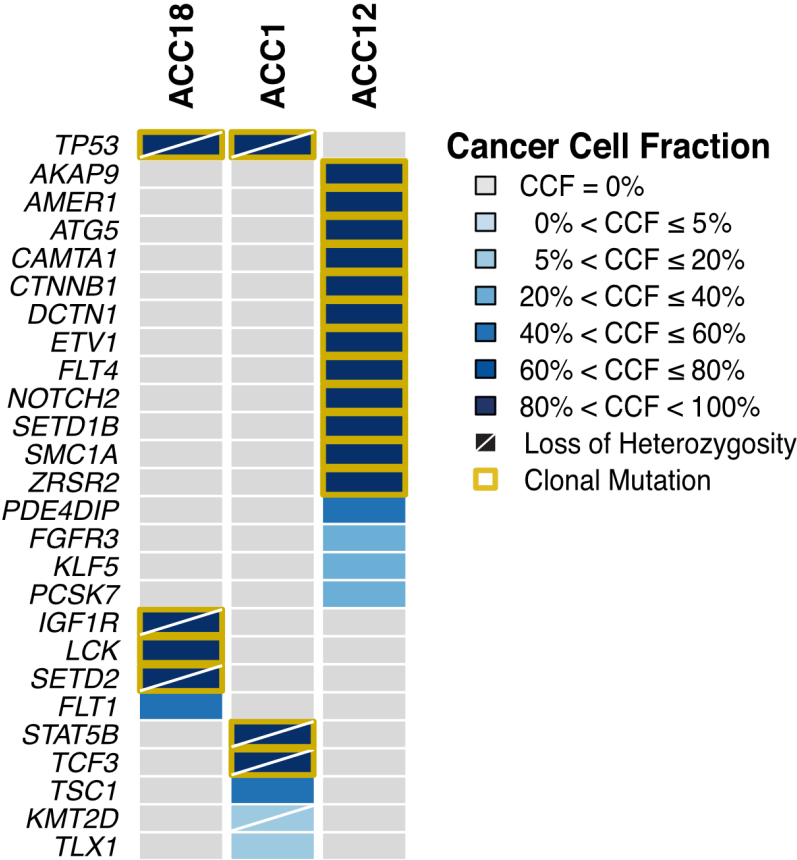

**Supplementary Figure 1. Cancer cell fractions of non-synonymous somatic mutations affecting cancer-related genes identified in the Acinic Cell Carcinomas (ACCs) of the breast by whole-exome sequencing.** Cancer cell fractions (CCFs) and clonality of non-synonymous somatic mutations affecting cancer related genes identified in ACCs (n=3) using whole-exome sequencing. Clonal mutations are depicted by a yellow box.



**Supplementary Table 1. Clinicopathologic characteristics of the Acinic Cell Carcinomas of the breast included in this study**

| Case ID | Age at diagnosis (years) | Growth pattern                   | Tubule formation | Nuclear pleomorphism | Mitotic count | Histologic grade* | ER status | HER2 status (IHC/FISH) |
|---------|--------------------------|----------------------------------|------------------|----------------------|---------------|-------------------|-----------|------------------------|
| ACC1    | 49                       | Microglandular                   | 1                | 3                    | 1             | 1                 | Negative  | Negative               |
| ACC12   | 42                       | Microglandular                   | 2                | 2                    | 1             | 1                 | Negative  | Negative               |
| ACC18   | N/A                      | Microglandular and hypernephroid | 1                | 1                    | 1             | 1                 | Negative  | Negative               |

\*Nottingham grading system. ER, estrogen receptor; FISH, fluorescence *in situ* hybridization; IHC, immunohistochemistry; N/A, not available.

**Supplementary Table 2: Fusion genes identified by RNA-sequencing analysis of Acinic Cell Carcinomas of the breast**

| Case ID | Fusion Caller          | 5' Gene               | 3' Gene       | 5' Mapping          | 3' Mapping          | Fusion Type       | Crossing Reads | Encompassing Reads | In Frame | Driver Probability (Oncofuse) | TCGA fusion data portal         |
|---------|------------------------|-----------------------|---------------|---------------------|---------------------|-------------------|----------------|--------------------|----------|-------------------------------|---------------------------------|
| ACC1T   | STAR-Integrate         | <i>PIK3AP1</i>        | <i>CRTAC1</i> | chr10:<br>98376396- | chr10:<br>99771094- | Intra-Chromosomal | 4              | 11                 | No       | 0.03893                       | Absent                          |
| ACC1T   | STAR-Integrate, Defuse | <i>SLC12A2</i>        | <i>PRRC1</i>  | chr5:<br>127450371+ | chr5:<br>126859150+ | Intra-Chromosomal | 1              | 7                  | No       | 0.28698                       | Absent                          |
| ACC1T   | STAR-Integrate         | <i>ZNF432</i>         | <i>ZNF841</i> | chr19:<br>52543737- | chr19:<br>52570859- | Intra-Chromosomal | 1              | 7                  | No       | 0.83258                       | Absent                          |
| ACC1T   | STAR-Integrate         | <i>PTGES3L-AARSD1</i> | <i>BRCA1</i>  | chr17:<br>41116123- | chr17:<br>41258550- | Intra-Chromosomal | 1              | 4                  | No       | 0.52748                       | Absent                          |
| ACC1T   | STAR-Integrate         | <i>PRRC2C</i>         | <i>GORAB</i>  | chr1:<br>171454873+ | chr1:<br>170508350+ | Intra-Chromosomal | 1              | 2                  | No       | 0.02169                       | Absent                          |
| ACC1T   | STAR-Integrate         | <i>TC2N</i>           | <i>FBLN5</i>  | chr14:<br>92302712- | chr14:<br>92403542- | Intra-Chromosomal | 1              | 2                  | No       | 0.19163                       | Present (Breast cancer, 2/1119) |
| ACC1T   | Defuse                 | <i>JMJD1C</i>         | <i>REEP3</i>  | chr10:<br>65140239- | chr10:<br>65281495- | Intra-Chromosomal | 7              | 13                 | No       | 0.07933                       | Absent                          |
| ACC1T   | Defuse                 | <i>URI1</i>           | <i>LTBP4</i>  | chr19:<br>30453087+ | chr19:<br>41111646- | Intra-Chromosomal | 7              | 9                  | No       | 0.0232                        | Absent                          |

**Supplementary Table 3: Whole-exome sequencing statistics.**

| <b>Case ID</b> | <b>Tissue type (Sample ID)</b> | <b>Total reads</b> | <b>Mean target coverage (X)</b> | <b>Target bases 2X</b> | <b>Target bases 50X</b> | <b>Target bases 100X</b> |
|----------------|--------------------------------|--------------------|---------------------------------|------------------------|-------------------------|--------------------------|
| ACC1           | Tumor (ACC1-T)                 | 316,773,539        | 276.31                          | 99.84                  | 97.27                   | 88.57                    |
|                | Normal (ACC1-N)                | 108,277,019        | 22.01                           | 99.53                  | 02.40                   | 00.01                    |
| ACC12          | Tumor (ACC12-T)                | 267,776,663        | 107.52                          | 99.73                  | 87.51                   | 54.14                    |
|                | Normal (ACC12-N)               | 181,406,979        | 90.96                           | 99.80                  | 74.66                   | 39.57                    |
| ACC18          | Tumor (ACC18-T)                | 268,448,663        | 226.98                          | 99.82                  | 97.26                   | 87.97                    |
|                | Normal (ACC18-N)               | 158,170,351        | 115.07                          | 99.79                  | 74.66                   | 39.57                    |

Supplementary Table 4: Non-synonymous somatic mutations identified in the Acinic Cell Carcinomas of the breast by whole-exome sequencing.

| Sample ID | Oncogene  | Amplification | Chromosomes | Genomic position | Reference allele | Alternate allele | Type of mutation | Depth of mutation (%) | Mutational fraction | HOTSPOT | Cancer Cell Fraction (CCF) | Probability of false discovery rate | Upper bound of 95% confidence interval for CCF | Lower bound of 95% confidence interval for CCF | Clonal status | Mutation status | CHAM (Breast) | PROVAX | FATHMM | Loss of heterozygosity (LOH) | Pathogenicity | Cancer Gene Census | Kaoudi et al | Cancer908 genes (Lawrence et al) |
|-----------|-----------|---------------|-------------|------------------|------------------|------------------|------------------|-----------------------|---------------------|---------|----------------------------|-------------------------------------|------------------------------------------------|------------------------------------------------|---------------|-----------------|---------------|--------|--------|------------------------------|---------------|--------------------|--------------|----------------------------------|
| ACC12T    | LRIG4     | p.R537G       | 1           | 1097704          | G                | C                | Missense         | 104                   | 23.1%               |         | 0.71227                    | 0.71227                             | 0.71227                                        | Clonal                                         | D             |                 |               |        |        |                              | Passenger     | No                 | No           | No                               |
| ACC12T    | CAMTA1    | p.T363M       | 1           | 772735           | C                | T                | Missense         | 104                   | 23.1%               |         | 0.71227                    | 0.71227                             | 0.71227                                        | Clonal                                         | D             |                 |               |        |        |                              | Passenger     | No                 | No           | No                               |
| ACC12T    | ERE       | p.R404G       | 1           | 842805           | T                | C                | Missense         | 65                    | 24.8%               |         | 0.78155                    | 0.78155                             | 0.78155                                        | Clonal                                         | D             |                 |               |        |        |                              | Passenger     | No                 | No           | No                               |
| ACC12T    | MEB       | p.M69I        | 1           | 1017669          | A                | G                | Missense         | 71                    | 17.3%               |         | 0.88133                    | 0.88133                             | 0.88133                                        | Clonal                                         | D             |                 |               |        |        |                              | Passenger     | No                 | No           | No                               |
| ACC12T    | MFN2      | p.F537V       | 1           | 1205881          | A                | T                | Missense         | 76                    | 19.0%               |         | 0.85617                    | 0.85617                             | 0.85617                                        | Clonal                                         | D             |                 |               |        |        |                              | Passenger     | No                 | No           | No                               |
| ACC12T    | C11orf134 | p.G18E        | 1           | 185988           | C                | T                | Missense         | 45                    | 11.1%               |         | 0.12729                    | 0.12729                             | 0.12729                                        | Subclonal                                      | N             |                 |               |        |        |                              | Passenger     | No                 | No           | No                               |
| ACC12T    | CROCC     | p.R603S       | 1           | 1096708          | C                | T                | Missense         | 51                    | 12.2%               |         | 0.17209                    | 0.17209                             | 0.17209                                        | Subclonal                                      | D             |                 |               |        |        |                              | Passenger     | No                 | No           | No                               |
| ACC12T    | GRH3      | p.R408I       | 1           | 2467408          | C                | A                | Missense         | 47                    | 11.1%               |         | 0.14827                    | 0.14827                             | 0.14827                                        | Clonal                                         | N             |                 |               |        |        |                              | Passenger     | No                 | No           | No                               |
| ACC12T    | CTZ       | p.L276I       | 1           | 1058230          | C                | T                | Missense         | 47                    | 11.1%               |         | 0.14827                    | 0.14827                             | 0.14827                                        | Clonal                                         | N             |                 |               |        |        |                              | Passenger     | No                 | No           | No                               |
| ACC12T    | CCDC17    | p.E10G        | 1           | 4409563          | C                | G                | Missense         | 69                    | 16.0%               |         | 0.02667                    | 0.02667                             | 0.02667                                        | Clonal                                         | N             |                 |               |        |        |                              | Passenger     | No                 | No           | No                               |
| ACC12T    | BRIN5     | p.R198H       | 1           | 4622474          | C                | G                | Missense         | 97                    | 18.8%               |         | 0.42736                    | 0.42736                             | 0.42736                                        | Subclonal                                      | D             |                 |               |        |        |                              | Passenger     | No                 | No           | No                               |
| ACC12T    | CCZ1B5    | p.H96Y        | 1           | 1589160          | C                | T                | Missense         | 39                    | 47.2%               |         | 0.94923                    | 0.94923                             | 0.94923                                        | Clonal                                         | D             |                 |               |        |        |                              | Passenger     | No                 | No           | No                               |
| ACC12T    | TRCC2     | p.L440V       | 1           | 8524427          | G                | A                | Missense         | 59                    | 28.0%               |         | 0.48613                    | 0.48613                             | 0.48613                                        | Clonal                                         | D             |                 |               |        |        |                              | Passenger     | No                 | No           | No                               |
| ACC12T    | PKM1      | p.K246E       | 1           | 11089912         | G                | A                | Missense         | 59                    | 28.0%               |         | 0.48613                    | 0.48613                             | 0.48613                                        | Clonal                                         | D             |                 |               |        |        |                              | Passenger     | No                 | No           | No                               |
| ACC12T    | NOTCH2    | p.P258A       | 1           | 1292508          | C                | T                | Missense         | 81                    | 23.0%               |         | 0.87847                    | 0.87847                             | 0.87847                                        | Subclonal                                      | N             |                 |               |        |        |                              | Passenger     | No                 | No           | No                               |
| ACC12T    | PCD4BP    | p.M334        | 1           | 1449170          | C                | T                | Missense         | 156                   | 14.1%               |         | 0.07633                    | 0.07633                             | 0.07633                                        | Subclonal                                      | D             |                 |               |        |        |                              | Passenger     | Yes                | No           | No                               |
| ACC12T    | PRF1      | p.Q296E       | 1           | 13505524         | C                | G                | Missense         | 91                    | 19.7%               |         | 0.49970                    | 0.49970                             | 0.49970                                        | Subclonal                                      | D             |                 |               |        |        |                              | Passenger     | No                 | No           | No                               |
| ACC12T    | LINGO4    | p.R101Q       | 1           | 15174729         | C                | T                | Missense         | 72                    | 45.8%               |         | 0.95557                    | 0.95557                             | 0.95557                                        | Clonal                                         | D             |                 |               |        |        |                              | Passenger     | No                 | No           | No                               |
| ACC12T    | KIAA007   | p.R188W       | 1           | 15888910         | G                | A                | Missense         | 113                   | 23.9%               |         | 0.64746                    | 0.64746                             | 0.64746                                        | Clonal                                         | D             |                 |               |        |        |                              | Passenger     | No                 | No           | No                               |
| ACC12T    | QSOX1     | p.G18E        | 1           | 1596970          | C                | T                | Missense         | 81                    | 30.0%               |         | 0.81744                    | 0.81744                             | 0.81744                                        | Clonal                                         | D             |                 |               |        |        |                              | Passenger     | No                 | No           | No                               |
| ACC12T    | IGSF1     | p.R67D        | 1           | 15990134         | G                | C                | Missense         | 59                    | 15.0%               |         | 0.30833                    | 0.30833                             | 0.30833                                        | Subclonal                                      | N             |                 |               |        |        |                              | Passenger     | No                 | No           | No                               |
| ACC12T    | ZNF448    | p.R69C        | 1           | 1320230          | C                | A                | Missense         | 81                    | 38.1%               |         | 0.85899                    | 0.85899                             | 0.85899                                        | Clonal                                         | D             |                 |               |        |        |                              | Passenger     | No                 | No           | No                               |
| ACC12T    | KF2B      | p.R130W       | 1           | 20597566         | C                | A                | Missense         | 135                   | 20.0%               |         | 0.08139                    | 0.08139                             | 0.08139                                        | Clonal                                         | N             |                 |               |        |        |                              | Passenger     | No                 | No           | No                               |
| ACC12T    | C1orf198  | p.S134N       | 1           | 23097928         | C                | G                | Missense         | 111                   | 27.0%               |         | 0.87219                    | 0.87219                             | 0.87219                                        | Clonal                                         | D             |                 |               |        |        |                              | Passenger     | No                 | No           | No                               |
| ACC12T    | WDR4      | p.R100R       | 1           | 6988932          | C                | G                | Missense         | 91                    | 32.0%               |         | 0.88869                    | 0.88869                             | 0.88869                                        | Clonal                                         | D             |                 |               |        |        |                              | Passenger     | No                 | No           | No                               |
| ACC12T    | C10orf90  | p.R123H       | 1           | 13818314         | C                | T                | Missense         | 135                   | 28.9%               |         | 0.90254                    | 0.90254                             | 0.90254                                        | Clonal                                         | N             |                 |               |        |        |                              | Passenger     | No                 | No           | No                               |
| ACC12T    | COL13     | p.E248R       | 11          | 88117            | T                | C                | Missense         | 186                   | 7.3%                |         | 0.16220                    | 0.16220                             | 0.16220                                        | Subclonal                                      | D             |                 |               |        |        |                              | Passenger     | No                 | No           | No                               |
| ACC12T    | C11orf89  | p.R81L        | 11          | 191173           | T                | C                | Missense         | 81                    | 45.4%               |         | 0.969                      | 0.969                               | 0.969                                          | Clonal                                         | D             |                 |               |        |        |                              | Passenger     | No                 | No           | No                               |
| ACC12T    | WEE1      | p.A577T       | 11          | 608854           | G                | A                | Missense         | 71                    | 25.4%               |         | 0.81                       | 0.81                                | 0.81                                           | Clonal                                         | D             |                 |               |        |        |                              | Passenger     | No                 | No           | No                               |
| ACC12T    | F2        | p.A576E       | 11          | 608854           | A                | C                | Missense         | 71                    | 25.4%               |         | 0.81                       | 0.81                                | 0.81                                           | Clonal                                         | D             |                 |               |        |        |                              | Passenger     | No                 | No           | No                               |
| ACC12T    | TMEM105   | p.R217T       | 11          | 8686854          | C                | T                | Missense         | 50                    | 8.0%                |         | 0.02168                    | 0.02168                             | 0.02168                                        | Subclonal                                      | D             |                 |               |        |        |                              | Passenger     | No                 | No           | No                               |
| ACC12T    | PKRX      | p.P188S       | 11          | 1294709          | C                | T                | Missense         | 183                   | 24.0%               |         | 0.83995                    | 0.83995                             | 0.83995                                        | Clonal                                         | N             |                 |               |        |        |                              | Passenger     | No                 | No           | No                               |
| ACC12T    | PKCZ      | p.S508R       | 11          | 1101900          | C                | T                | Missense         | 110                   | 23.0%               |         | 0.82002                    | 0.82002                             | 0.82002                                        | Clonal                                         | D             |                 |               |        |        |                              | Passenger     | No                 | No           | No                               |
| ACC12T    | OR10D9    | p.K295D       | 11          | 12389462         | A                | C                | Missense         | 71                    | 7.0%                |         | 0.0283837                  | 0.0283837                           | 0.0283837                                      | Subclonal                                      | N             |                 |               |        |        |                              | Passenger     | No                 | No           | No                               |
| ACC12T    | PRDM1     | p.T164M       | 11          | 12651470         | A                | C                | Missense         | 29                    | 8.0%                |         | 0.02051                    | 0.02051                             | 0.02051                                        | Subclonal                                      | D             |                 |               |        |        |                              | Passenger     | No                 | No           | No                               |
| ACC12T    | WNT5B     | p.R202W       | 12          | 1785122          | C                | T                | Missense         | 187                   | 28.1%               |         | 0.90915                    | 0.90915                             | 0.90915                                        | Clonal                                         | D             |                 |               |        |        |                              | Passenger     | No                 | No           | No                               |
| ACC12T    | BCL11     | p.E830K       | 12          | 2488689          | C                | T                | Missense         | 59                    | 49.2%               |         | 0.98995                    | 0.98995                             | 0.98995                                        | Clonal                                         | N             |                 |               |        |        |                              | Passenger     | No                 | No           | No                               |
| ACC12T    | SMIT2     | p.G294H       | 12          | 2926038          | C                | T                | Missense         | 59                    | 49.2%               |         | 0.98995                    | 0.98995                             | 0.98995                                        | Clonal                                         | N             |                 |               |        |        |                              | Passenger     | No                 | No           | No                               |
| ACC12T    | ALX1      | p.R46L        | 12          | 8667420          | G                | T                | Missense         | 53                    | 47.2%               |         | 0.95465                    | 0.95465                             | 0.95465                                        | Clonal                                         | D             |                 |               |        |        |                              | Passenger     | No                 | No           | No                               |
| ACC12T    | ITNA      | p.N230D       | 12          | 1083170          | G                | C                | Missense         | 142                   | 28.0%               |         | 0.87327                    | 0.87327                             | 0.87327                                        | Clonal                                         | D             |                 |               |        |        |                              | Passenger     | No                 | No           | Yes                              |
| ACC12T    | TUBB3C    | p.V434M       | 12          | 1414544          | C                | T                | Missense         | 81                    | 27.0%               |         | 0.7270031                  | 0.7270031                           | 0.7270031                                      | Subclonal                                      | N             |                 |               |        |        |                              | Passenger     | No                 | No           | No                               |
| ACC12T    | ZNF476    | p.D59V        | 13          | 2042045          | T                | A                | Missense         | 71                    | 12.7%               |         | 0.00991                    | 0.00991                             | 0.00991                                        | Subclonal                                      | N             |                 |               |        |        |                              | Passenger     | No                 | No           | No                               |
| ACC12T    | COMP      | p.R94C        | 13          | 2042045          | T                | A                | Missense         | 71                    | 12.7%               |         | 0.00991                    | 0.00991                             | 0.00991                                        | Subclonal                                      | N             |                 |               |        |        |                              | Passenger     | No                 | No           | No                               |
| ACC12T    | DMPH3     | p.S496L       | 13          | 8054158          | G                | A                | Missense         | 22                    | 54.9%               |         | 0.29297                    | 0.29297                             | 0.29297                                        | Clonal                                         | D             |                 |               |        |        |                              | Passenger     | No                 | No           | No                               |
| ACC12T    | KLF5      | p.G420D       | 13          | 7348008          | G                | A                | Missense         | 197                   | 6.1%                |         | 0.01402791                 | 0.01402791                          | 0.01402791                                     | Subclonal                                      | D             |                 |               |        |        |                              | Passenger     | No                 | No           | No                               |
| ACC12T    | TMEM44    | p.V121R       | 13          | 8207100          | G                | A                | Missense         | 102                   | 10.0%               |         | 0.17209                    | 0.17209                             | 0.17209                                        | Subclonal                                      | D             |                 |               |        |        |                              | Passenger     | No                 | No           | No                               |
| ACC12T    | SFT3A     | p.P36A        | 14          | 3946277          | G                | C                | Missense         | 70                    | 54.3%               |         | 0.94812                    | 0.94812                             | 0.94812                                        | Clonal                                         | N             |                 |               |        |        |                              | Passenger     | No                 | No           | No                               |
| ACC12T    | SRB1      | p.K841T       | 14          | 4888113          | G                | C                | Missense         | 63                    | 44.0%               |         | 0.84873                    | 0.84873                             | 0.84873                                        | Clonal                                         | D             |                 |               |        |        |                              | Passenger     | No                 | No           | No                               |
| ACC12T    | ATRN3     | p.Q336R       | 14          | 5053354          | C                | G                | Missense         | 55                    | 58.9%               |         | 0.9566                     | 0.9566                              | 0.9566                                         | Clonal                                         | P             |                 |               |        |        |                              | Passenger     | No                 | No           | No                               |
| ACC12T    | IGFBP3    | p.Y114H       | 14          | 10585239         | A                | G                | Missense         | 20                    | 56.0%               |         | 0.01022                    | 0.01022                             | 0.01022                                        | Subclonal                                      | D             |                 |               |        |        |                              | Passenger     | No                 | No           | No                               |
| ACC12T    | IGFBP3    | p.Y114H       | 14          | 10585239         | A                | G                | Missense         | 20                    | 56.0%               |         | 0.01022                    | 0.01022                             | 0.01022                                        | Subclonal                                      | D             |                 |               |        |        |                              | Passenger     | No                 | No           | No                               |
| ACC12T    | MAR2      | p.A271Y       | 15          | 4382182          | C                | T                | Missense         | 97                    | 24.7%               |         | 0.81898                    | 0.81898                             | 0.81898                                        | Clonal                                         | D             |                 |               |        |        |                              | Passenger     | No                 | No           | No                               |
| ACC12T    | SOX11     | p.S201R       | 15          | 4481190          | C                | T                | Missense         | 29                    | 10.0%               |         | 0.02051                    | 0.02051                             | 0.02051                                        | Subclonal                                      | D             |                 |               |        |        |                              | Passenger     | No                 | No           | No                               |
| ACC12T    | SRH       | p.R442A       | 15          | 4424254          | C                | T                | Missense         | 164                   | 6.7%                |         | 0.04834901                 | 0.04834901                          | 0.04834901                                     | Subclonal                                      | D             |                 |               |        |        |                              | Passenger     | No                 | No           | No                               |
| ACC12T    | CCDC113   | p.R81H        | 16          | 9828715          | C                | T                | Missense         | 115                   | 20.0%               |         | 0.05442                    | 0.05442                             | 0.05442                                        | Clonal                                         | N             |                 |               |        |        |                              | Passenger     | No                 | No           | No                               |
| ACC12T    | DHSE      | p.G280D       | 16          | 1028801          | C                | T                | Missense         | 71                    | 13.0%               |         | 0.1392                     | 0.1392                              | 0.1392                                         | Subclonal                                      | D             |                 |               |        |        |                              | Passenger     | No                 | No           | No                               |
| ACC12T    | SPG7      | p.R451P       | 16          | 1658621          | G                | C                | Missense         | 24                    | 16.7%               |         | 0.03029                    | 0.03029                             | 0.03029                                        | Subclonal                                      | D             |                 |               |        |        |                              | Passenger     | No                 | No           | No                               |
| ACC12T    | SDG4      | p.A407T       | 17          | 1028801          | C                | T                | Missense         | 97                    | 24.0%               |         | 0.83995                    | 0.83995                             | 0.83995                                        | Subclonal                                      | D             |                 |               |        |        |                              | Passenger     | No                 | No           | No                               |
| ACC12T    | FRS3      | p.R121H       | 17          | 818830           | C                |                  |                  |                       |                     |         |                            |                                     |                                                |                                                |               |                 |               |        |        |                              |               |                    |              |                                  |



**Supplementary Table 5: Genomic features of Homologous Recombination Deficiency and Microsatellite Instability in the Acinic Cell Carcinomas of the breast included in this study.**

| Sample | % MSI | LST score | Myriad score | NtAI Score | Indels (n) | Indels (%) | Average indel length (bp) |
|--------|-------|-----------|--------------|------------|------------|------------|---------------------------|
| ACC1   | 3.19  | 4         | 3            | 5          | 2          | 2.11       | 4                         |
| ACC12  | 10.93 | 0         | 0            | 0          | 48         | 17.3       | 3.22                      |
| ACC18  | 0.35  | 24        | 11           | 23         | 9          | 8.82       | 12.33                     |

%MSI, Microsatellite instability score (MSIsensor score); LST, Large-scale State Transitions; NtAI, Telomere Allelic Imbalance score; indels, insertions or deletions.
